# Supplementary material
Source: publisher figshare collection journal article supplement (https://acs.figshare.com/ndownloader/files/21500319)
Supplement: Supplementary file 1 [file 21500319]

## Supporting Information

### Large Area Vertically Oriented Few-Layer MoS<sub>2</sub> for Efficient Thermal Conduction and Optoelectronic Applications

*Bishnu Pada Majee, Bhawna, Ankita Singh, Rajiv Prakash, and Ashish Kumar Mishra*

School of Materials Science and Technology,

Indian Institute of Technology (Banaras Hindu University), Varanasi-221005, India

Email: akmishra.mst@iitbhu.ac.in

#### S1- AFM Study:

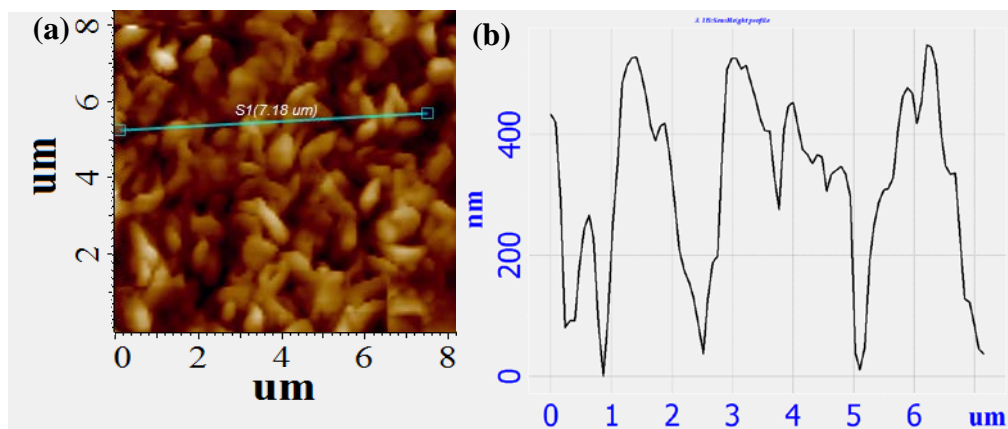

**Figure S1.** (a) AFM image of VFL-MoS<sub>2</sub> in 2D view. (b) Height profile for VFL-MoS<sub>2</sub>.

AFM image indicates uniform growth of vertically oriented MoS<sub>2</sub> over Si. The height profile of the vertically grown MoS<sub>2</sub> sample shows the MoS<sub>2</sub> nanoflakes height around 500 nm in the perpendicular direction to the substrate i.e. vertical direction.

## S2- Schematic of optothermal Raman technique

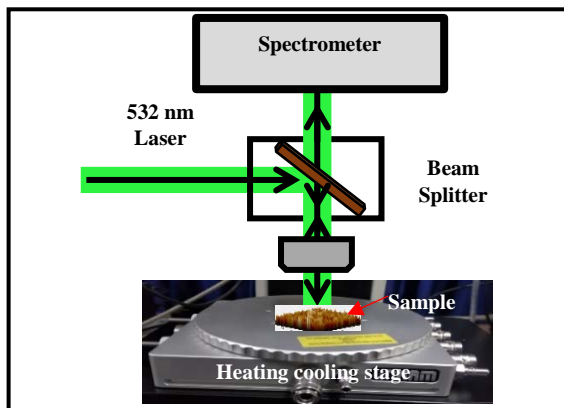

**Figure S2.** Schematic of optothermal Raman technique

Thermal conductivity of VFL-MoS<sub>2</sub> nanoflakes was investigated using optothermal Raman technique, as shown schematically in Figure S2.

## S3- Temperature dependent Study

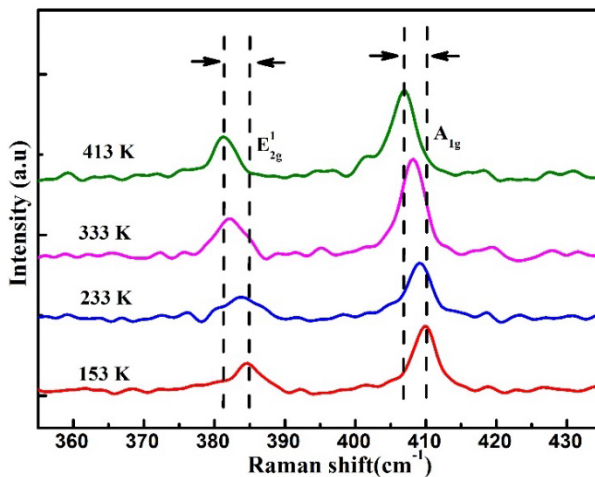

**Figure S3.** Temperature dependent Raman spectra of VFL-MoS<sub>2</sub> at different temperatures

A redshift is observed for both in-plane vibration E<sub>2g</sub> and out-of-plane vibration A<sub>1g</sub> modes with the increase in temperature.

#### S4- Schematic of heat conduction process

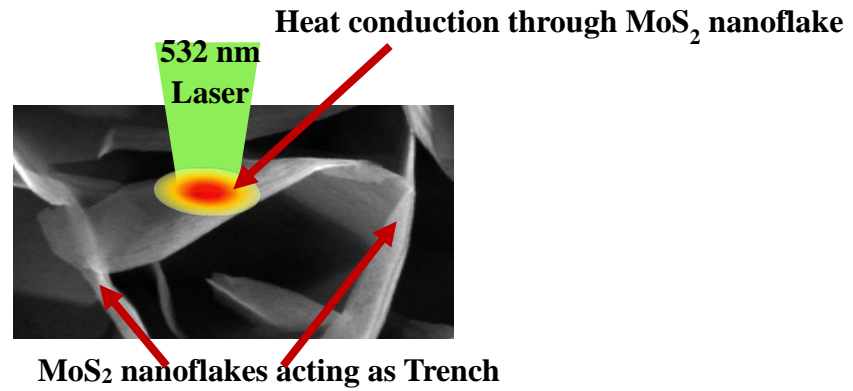

**Figure S4.** Schematic of heat conduction process in VFL-MoS<sub>2</sub>.

The vertically oriented few-layer MoS<sub>2</sub> behaves like suspended flakes between other two flakes acting as trench for heat sink. The laser spot size is comparable to the lateral dimension of grown MoS<sub>2</sub>.
